# Supplementary material for: Simultaneous two and three photon resonant enhancement of third-order NLO susceptibility in an azo-dye functionalized polymer film
Source: Royal Society of Chemistry journal article supplement (doi:10.1039/c3cp50547b), 2013-01-01
Supplement: c3cp50547b.pdf [file c3cp50547b.pdf]

# Simultaneous two and three photon resonant enhancement of third-order NLO susceptibility in an azo-dye functionalized polymer film

ESI for communication in PCCP

Florica Adriana Jerca,<sup>a,b</sup> Valentin Victor Jerca,<sup>a</sup> Francois Kajzar,<sup>c,d</sup> Ana Maria Manea,<sup>c</sup> Ileana Rau,<sup>c</sup> and Dumitru Mircea Vuluga<sup>\*a</sup>

<sup>a</sup> Centre for Organic Chemistry Costin D. Nenitescu, Romanian Academy, 202B Spl. Independentei CP 35-108, 060023, Bucharest, Romania.

Fax: 40213121601; Tel: 40213167900; E-mail: [mircea.vuluga@gmail.com](mailto:mircea.vuluga@gmail.com)

<sup>b</sup> Ilie Murgulescu Institute of Physical Chemistry, Colloid Department, 202 Spl. Independentei CP 12-194, 060021, Bucharest, Romania.; E-mail: [adriana\\_jerca@yahoo.com](mailto:adriana_jerca@yahoo.com)

<sup>c</sup> University "POLITEHNICA" of Bucharest, Faculty of Applied Chemistry and Materials Science, 1-7 Polizu Street, 011061, Bucharest, Romania. E-mail: [ileana\\_brandusa@yahoo.com](mailto:ileana_brandusa@yahoo.com)

<sup>d</sup> Université d'Angers, Institut des Sciences et Technologies Moléculaires d'Angers, Bd Lavoisier, 49045, Angers, cedex, France. E-mail: [frkajzar@yahoo.com](mailto:frkajzar@yahoo.com)

## Atomic force microscopy (AFM) characterization of the PMMA-M3 film

**Instrument:** MultiMode 8 Atomic Force Microscope (Bruker), equipped with a Nanoscope V controller, operated in tapping mode, using a cantilever length of 225  $\mu\text{m}$ , with etched silicon tip (nominal radius 8 nm) and a resonance frequency of about 75 kHz. AFM measurements were performed at room temperature with a scan rate of 1 Hz.

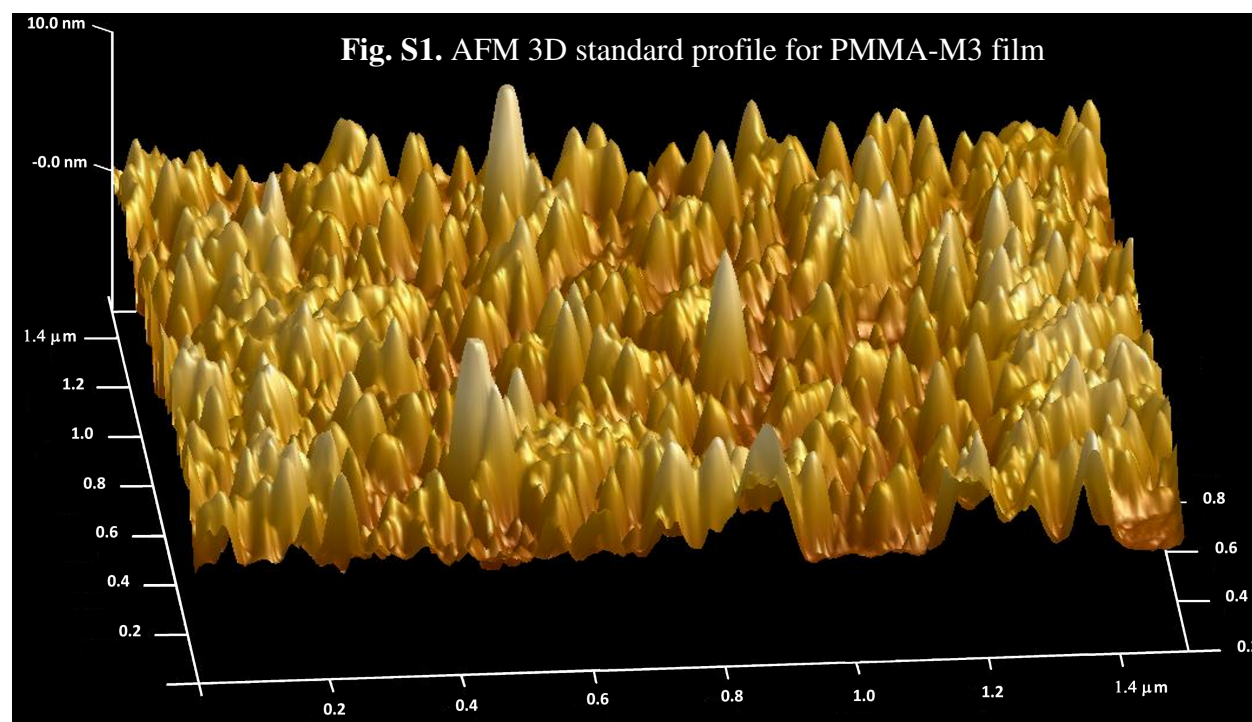

### Results Roughness PMMA-M3

|                               |                      |
|-------------------------------|----------------------|
| Image Z Range                 | 13.8 nm              |
| Image Surface Area            | 1.05 $\mu\text{m}^2$ |
| Image Projected Surface Area  | 1.04 $\mu\text{m}^2$ |
| Image Surface Area Difference | 0.613 %              |
| Image Rq                      | 1.38 nm              |
| Image Ra                      | 0.944 nm             |
| Image Rmax                    | 13.8 nm              |

### Results Depth PMMA-M3

|                            |          |
|----------------------------|----------|
| Peak to Peak Distance      | 1.076 nm |
| Minimum Peak Depth         | 9.088 nm |
| Maximum Peak Depth         | 10.2 nm  |
| Depth at Histogram Maximum | 10.16 nm |

\*\*\* **Acknowledgment:** authors are grateful to Dr Denis Mihaela PANAITESCU from ICECHIM-Bucharest, Romania ([denisspan02@yahoo.com](mailto:denisspan02@yahoo.com)) for the AFM measurements.

## Thermal Analysis of the PMMA-M3 polymer

### *Instrument:*

NETZSCH STA 449C Jupiter system;  
simultaneous TGA-DSC was carried out from  
ambient temperature up to 700°C at a heating  
rate of 5°C/min under helium gas flow.

### *Characteristic values:*

|                            |                               |
|----------------------------|-------------------------------|
| Glass transition temp.     | $T_g=148^\circ\text{C}$       |
| Onset of degradation temp. | $T_{on}=246^\circ\text{C}$    |
| Temp. at 5% weight loss    | $T_{5\%}=271.5^\circ\text{C}$ |

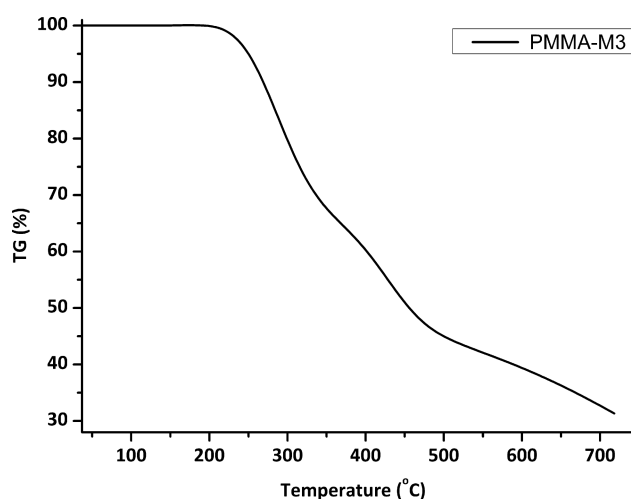

**Fig. S2.** Thermogravimetry curve of PMMA-M3

## Optical transparency of the PMMA-M3 film

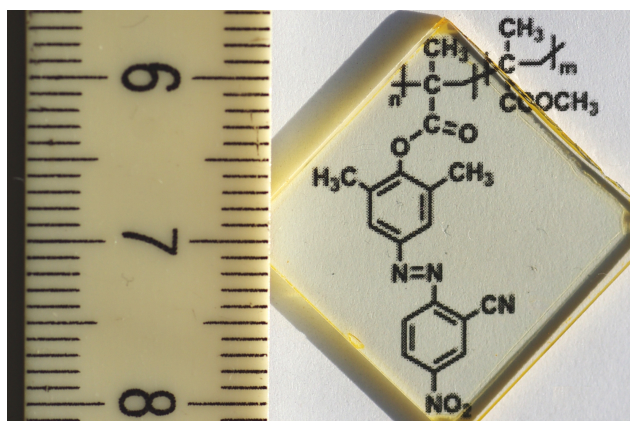

The optical photography reveals the good quality of the film, the paper roughness and printer fading can be seen with equal sharpness directly and through the film

**Fig. S3.** Optical photography of the PMMA-M3 film

### Optical bench for THG measurements

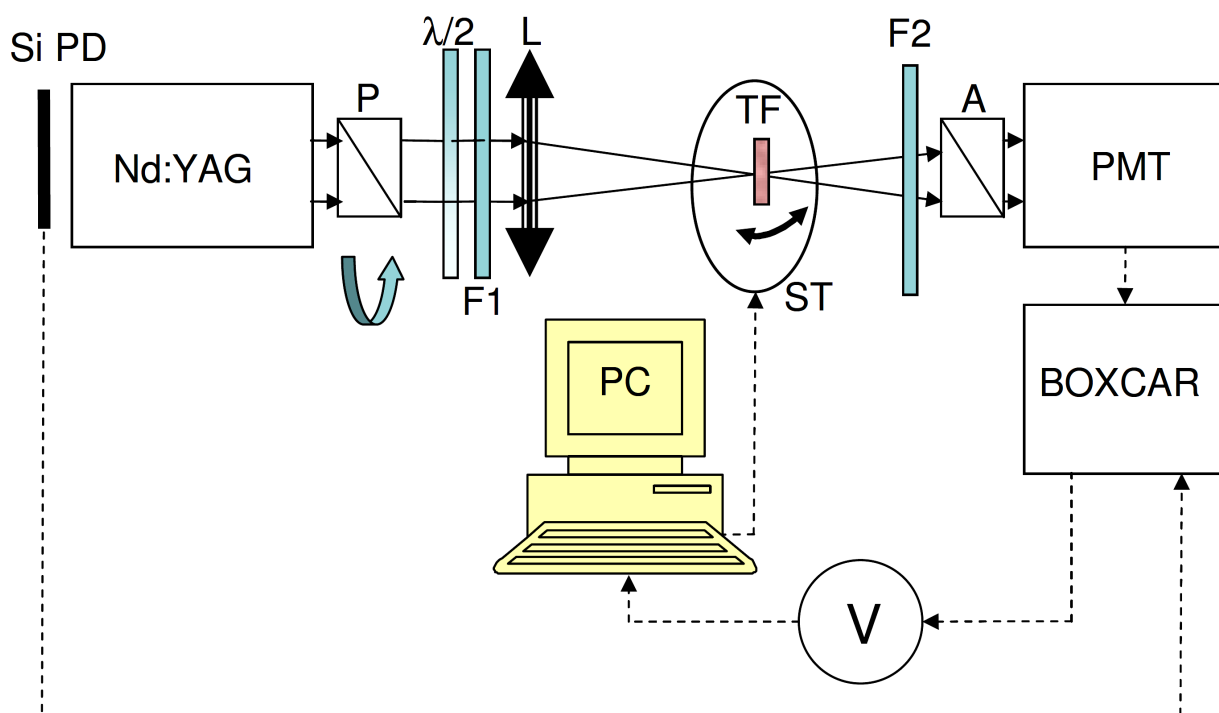

**Fig. S4.** Experimental setup used for THG measurements: *Nd:YAG* - 1064.2 nm pulsed laser; *P* - polarizer for checking polarization of fundamental beam;  $\lambda/2$  - half wave plate; *F1* - attenuation filters; *L* - converging lens; *TF* - studied film; *ST* - computer controlled rotating sample stage; *F2* - 3rd harmonic filters: 355 nm narrow pass interference filter and 1064.2 nm cutting filter; *A* - analyzer for harmonic beam; *PMT* - photomultiplier tube; *BOXCAR* - triggered amplifier; *V* - digital voltmeter; *Si PD* - fast Si photodiode for laser power control and signal triggering; *PC* - computer for system control and data recording.

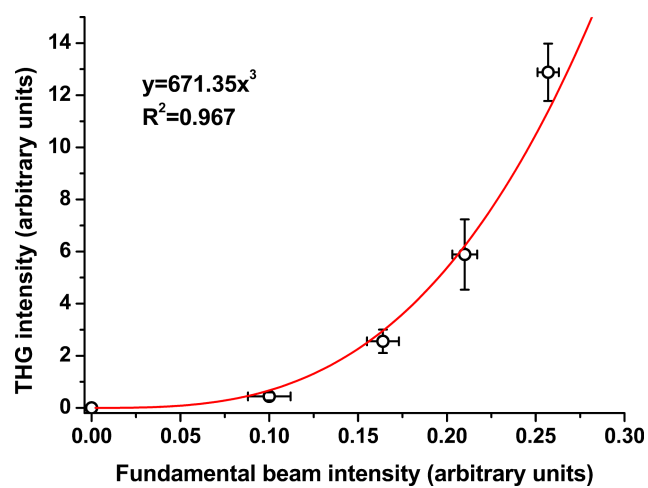

**Fig. S5.** THG intensity dependence on excitation power

**Fig.S6.** Chemical formula for the reference dye - the Disperse Red 1

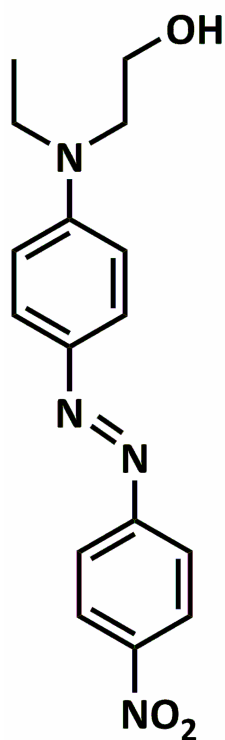

N-Ethyl-N-(2-hydroxyethyl)-4-(4'-nitrophenylazo) aniline
